# Supplementary material for: Observation and identification of autofluorescent urine crystals may be linked to a sign of urolithiasis
Source: Research Square preprint supplement (doi:10.21203/rs.3.rs-1476780/v1), 2022-03-24
Supplement: Supplementary file 1 [file 0ca167342b751086e7b68c81.docx]

Supplementary information (SI)

**Observation and identification of autofluorescent urine crystals in urolithiasis patients**

**Syue-Liang Lin,1,2 Chen-Yuan Chung,1 Yi-Hsiu Huang,3 Zih-Ting Chen,1 Chih-Chia Huang,4 Yun-Zhen Li,1 Huihua Kenny Chiang1,2,***

1Department of Biomedical Engineering, National Yang Ming Chiao Tung University, Taipei 112, Taiwan (ROC)

2Biomedical Engineering Research and Development Center, National Yang Ming Chiao Tung University, Taipei 112, Taiwan (ROC)

3Department of Urology, Taipei Veterans General Hospital, Taipei 112, Taiwan (ROC)

4Department of Photonics, National Cheng Kung University, Tainan 701, Taiwan (ROC)

*****Huihua Kenny Chiang**,** E-mail: [chiang@nycu.edu.tw](mailto:chiang@nycu.edu.tw)


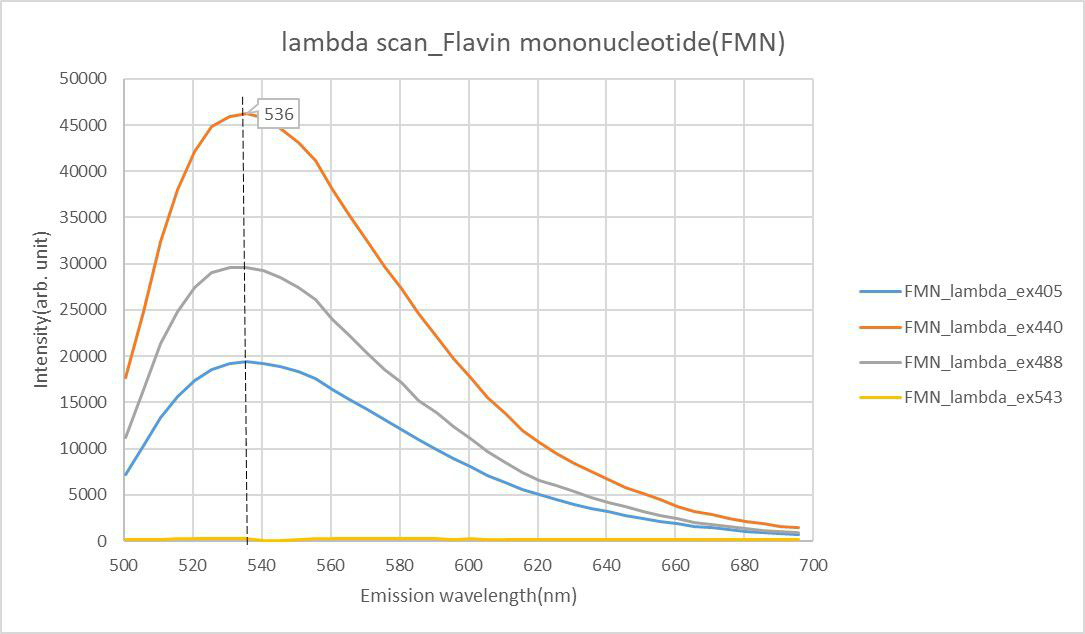


Fig. S1 The emission spectra of riboflavin fluorophore at different excitation wavelengths (λex: 405, 440, 488, and 543 nm).
